# Supplementary material for: Individual Human Brain Areas Can Be Identified from Their Characteristic Spectral Activation Fingerprints
Source: PLoS Biol. 2016 Jun 29;14(6):e1002498. doi: 10.1371/journal.pbio.1002498 (PMC4927181; doi:10.1371/journal.pbio.1002498)
Supplement: S1 Data — (first column) Region of interest (ROI) number in AAL atlas. (second column) Mean rank of classification analysis for each area. (third column) Radius r (in cm) from the centre of the brain for each area (centre of ROI). (XLSX) [file pbio.1002498.s001.xlsx]

## Sheet: Sheet1
Mean Ranks Data
ROI	Mean Rank	Radius
1	1.55	6.28008
2	3.725	6.68916
3	1.4875	5.45615
4	3.0375	5.55214
5	2.9375	5.74456
6	1.3375	5.52771
7	1.4375	5.69108
8	3.1	5.97605
9	3.325	5.58971
10	1.725	5.97102
11	1.525	5.25862
12	1.9	5.4637
13	2.225	5.5445
14	1.4625	6.00046
15	2.9875	4.84553
16	1.4	5.33464
17	2.2625	5.01597
18	2.6	5.3397
19	2.4875	5.89418
20	1.4	6.15365
21	2.4375	1.87083
22	1.0125	2.77263
23	2.125	5.56411
24	1.8125	5.75423
25	1.7	5.12348
26	2.3875	5.1614
27	1.2	4.15707
28	2.2375	4.15331
29	1.9375	3.69293
30	1.0125	3.87035
31	1.025	3.44566
32	1.025	4.29418
33	1.0625	4.67206
34	1.7125	3.86494
35	2.25	5.22303
36	1.8	4.91172
37	2.3125	3.82623
38	1.1375	3.92012
39	1.8	3.47761
40	1.0125	3.7027
41	1.95	3.20156
42	1.125	3.60555
43	1.7	8.19054
44	1.625	7.71947
45	1.1375	8.37845
46	2.625	8.40224
47	3.575	6.6964
48	1.475	7.13408
49	3	9.32827
50	3.6	9.20489
51	1.325	8.95025
52	4.05	9.12921
53	1.95	8.74017
54	2.1625	9.17824
55	1.5125	5.32332
56	1.0125	5.62863
57	2.6375	6.92708
58	2.475	7.15055
59	1.4625	8.76115
60	2.65	8.89757
61	2.0375	7.7366
62	2.4125	7.87401
63	3.5875	7.43934
64	2.525	7.4458
65	1.15	8.72771
66	1.875	8.44408
67	1.0625	7.31969
68	2.0125	7.1112
69	1.1375	7.4403
70	1.45	7.476
71	1.725	1.81265
72	1	1.93091
73	2.2625	2.18529
74	1.1125	2.78887
75	1.4125	1.5
76	1.0375	2
77	1.6	2.53616
78	2	2.487
79	1.95	5.27046
80	1.7125	5.02494
81	2.075	5.64004
82	1.675	6.34037
83	2.0875	4.65833
84	1.525	5.30625
85	1.275	6.63376
86	1.5625	6.9575
87	1.5125	5.34713
88	1.9875	5.71839
89	1.2875	6.33936
90	1.3125	6.78604
91	2.6125	7.9917
92	1.825	8.37735
93	3.4625	8.87894
94	2.0375	8.756
95
96	2.1125	4.58258
97	3.3375	4.97649
98	2.3875	4.98435
99	1.75	6.77501
100	1.675	7.09533
101	1.475	7.98827
102	2.425	9.5
103	1.3875	7.81647
104	1	8.19658
105	1.3125	7.07107
106	1	7.17217
107	1.4	5.38516
108	1.725	5.83095
109	1	4.47214
110	1.9375	4.12311
111	3.7125	5.45894
112	3	6.87184
113	2.1	7.90569
114	2.3375	7.38241
115	1.5125	6.80074
116	1.3	5.83095
